# Supplementary material for: Dating app use and unhealthy weight control behaviors among a sample of U.S. adults: a cross-sectional study
Source: PubMed Central journal article supplement (PMC6543621; doi:10.1186/s40337-019-0244-4), 2019-05-31
Supplement: 40337_2019_244_MOESM1_ESM.pdf [file 40337_2019_244_MOESM1_ESM.pdf]

Table S1. Adjusted Odds of UWCBS among adults in the Harvard Chan Physical Activity Study (N=1,726)\*

|                       | OR (95% CI)                  |                             |                             |                             |                                             |                               |
|-----------------------|------------------------------|-----------------------------|-----------------------------|-----------------------------|---------------------------------------------|-------------------------------|
|                       | Vomiting                     | Laxative Use                | Fasting                     | Diet Pill Use               | Muscle Building Supplement Use <sup>a</sup> | Anabolic Steroid Use          |
| <b>Dating App Use</b> |                              |                             |                             |                             |                                             |                               |
| User                  | <b>7.652 (5.302, 11.044)</b> | <b>6.331 (4.551, 8.808)</b> | <b>2.546 (1.992, 3.255)</b> | <b>6.824 (4.904, 9.495)</b> | <b>4.227 (3.128, 5.713)</b>                 | <b>13.003 (8.237, 20.529)</b> |
| Non-user (ref)        | 1.0                          | 1.0                         | 1.0                         | 1.0                         | 1.0                                         | 1.0                           |

Note: \*Models adjusted for sex, race/ethnicity, sexual orientation, income, age, marital status, and body mass index. Boldface indicates statistical significance ( $p < 0.05$ ). CIs = confidence interval.

<sup>a</sup>Includes products such as creatine, amino acids, DHEA, hydroxyl methylbutyrate [HMB], or growth hormone.
